# Supplementary material
Source: publisher figshare collection journal article supplement (https://gsajournals.figshare.com/articles/dataset/_/13634777)
Supplement: Supplementary file 2 [file 1]

Supp. Figure 2

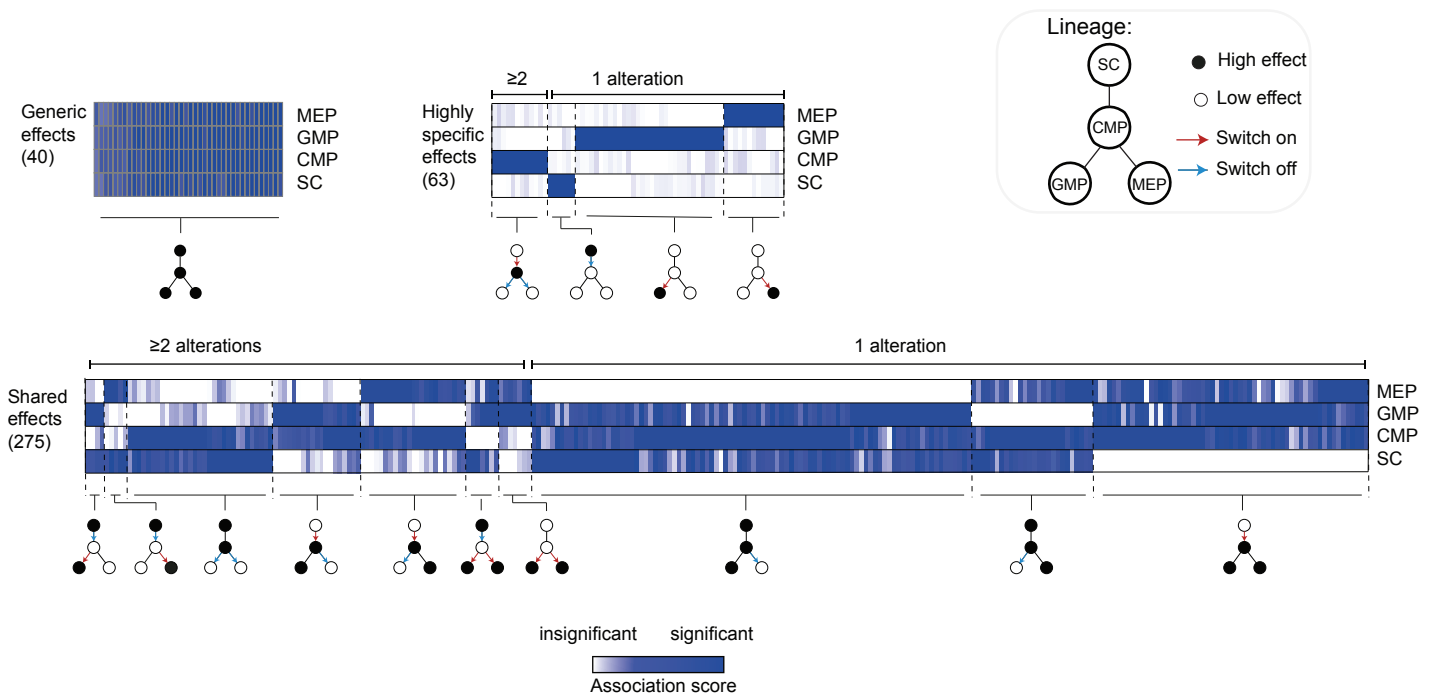

**Figure S2: The cell lineage is informative for eQTL studies.** Plot is shown as in **Figure 1B**, using a different cutoff: included are all eQTLs with p-value  $< 10^{-6}$  in at least one cell type.
