# Supplementary material
Source: publisher figshare collection journal article supplement (https://gsajournals.figshare.com/articles/dataset/_/13634777)
Supplement: Supplementary file 3 [file 1]

Supp. Figure 3

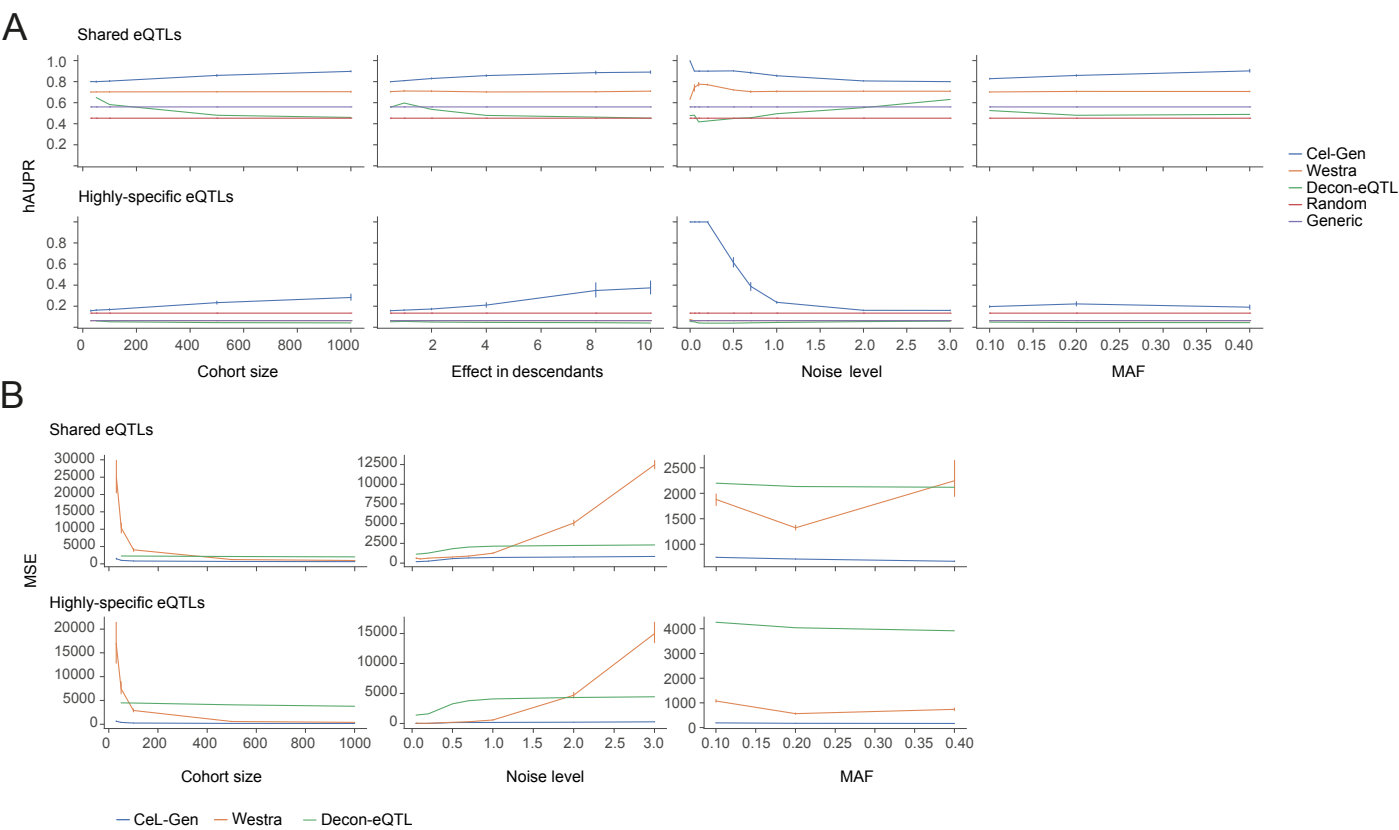

**Figure S3: Benchmarking using synthetic data: switch-off data.** **(A)** Analysis of the ability to identify the correct branch of alteration, in the case of switch-off simulations. Shown is the area under the hierarchical precision and recall curve (hAUPR, y axis), for different prediction methods (color coded) and across data parameter values (x axis). Error bars: 95% confidence intervals of hAUPR values. In all cases, cell type composition was inferred (through deconvolution method). Results are shown for synthetic datasets of shared (top) and highly-specific (bottom) eQTLs. **(B)** Analysis of the ability to identify the correct effect size, in the case of switch-off simulations. Shown is the mean squared error between the simulated and predicted effect size (MSE, y axis, with 95% confidence intervals) for different methods (color coding) across data parameter values (x axis). In all cases, cell type composition was inferred through deconvolution method. Results are shown for synthetic datasets of shared (top) and highly-specific (bottom) eQTLs.
