# Supplementary material
Source: publisher figshare collection journal article supplement (https://gsajournals.figshare.com/articles/dataset/_/13634777)
Supplement: Supplementary file 4 [file 1]

## Supp. Figure 4

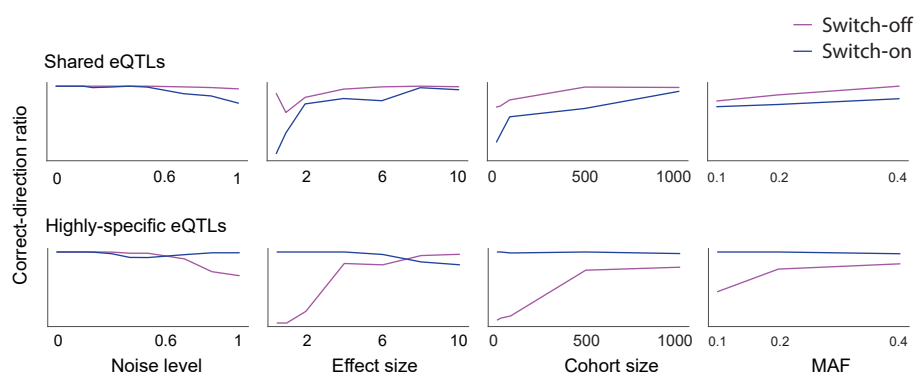

**Figure S4: The ability to identify the direction of alteration in effect size.** The correct-direction ratio (y axis) across different data parameter values (x axis) using CeL-Gen, for switch-on (blue) and switch-off (purple) datasets. Results are shown for datasets of shared eQTLs (top) and highly-specific eQTLs (bottom). In all cases, cell type composition was inferred using deconvolution methods.
