# Supplementary material
Source: publisher figshare collection journal article supplement (https://gsajournals.figshare.com/articles/dataset/_/13634777)
Supplement: Supplementary file 5 [file 1]

Supp. Figure 5

A

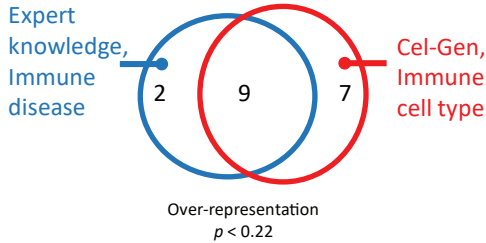

B

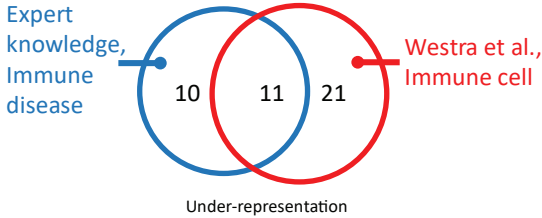

**Figure S5: Quality assessment.** Shown is the overlap between predicted (red) and known (blue) immune-cell-type specificity. A and B for the CeL-Gen and Westra methods, respectively. Known immune cell type specificity is based on expert knowledge of relevant diseases. Hyper geometric test P-values are indicated below.
